# Supplementary material for: An ALP-responsive, anionic iridium complex for specific recognition of osteosarcoma cells
Source: Royal Society of Chemistry journal article supplement (doi:10.1039/d4dt00568f), 2024-01-01
Supplement: d4dt00568f1.pdf [file d4dt00568f1.pdf]

## Supporting information

### **ALP-Responsive, Anionic Iridium complex for Specific Recognition of Osteosarcoma Cells**

*Shuang Shen*<sup>1</sup>, *Shuli Nong*<sup>1</sup>, *Xianpeng Zhang*<sup>1</sup>, *Jiaqi Song*<sup>2</sup>, *Caiting Meng*<sup>2</sup>, *Xinling Liu*<sup>2</sup>, *Liang Shao*<sup>2</sup>, *Guanying Li*<sup>2, \*</sup>, *Li Xu*<sup>1, \*</sup>

<sup>1</sup> School of Chemistry and Chemical Engineering, Guangdong Pharmaceutical University, Zhongshan, Guangdong Province, 528458, P.R. China;

<sup>2</sup> Department of Biophysics, School of Basic Medical Sciences, Health Science Centre, Xi'an Jiaotong University, Xi'an, Shaanxi Province, 710061, P.R. China;

\* Corresponding authors: [guanyingli@xjtu.edu.cn](mailto:guanyingli@xjtu.edu.cn) (G. Li); [xuli473@163.com](mailto:xuli473@163.com) (L. Xu).

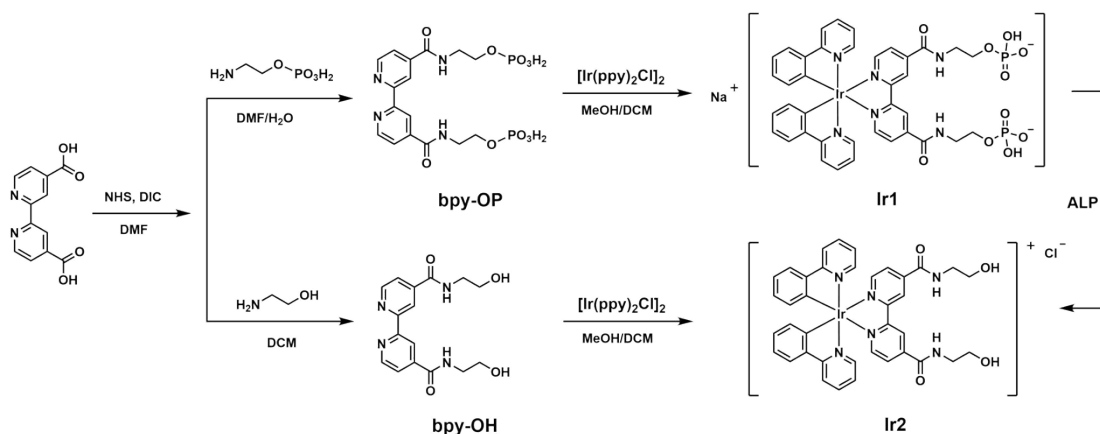

**Scheme S1.** Synthesis routes of **Ir1** and **Ir2**, and the ALP-mediated conversion reaction. Abbreviations of chemicals are: N-hydroxysuccinimide (NHS); N,N'-diisopropylcarbodiimide (DIC); 2-phenyl pyridine (ppy).

**Table S1.** Lifetime and fluorescence quantum yield of **Ir1** and **Ir2** in the different media.

| Sample               | $\tau_{\text{ave}}(\text{ns})$ | $\Phi_{\text{S}}$ |
|----------------------|--------------------------------|-------------------|
| <b>Ir1</b> in water  | 74.25                          | 0.0082            |
| <b>Ir1</b> in 98%THF | 235.78                         | 0.187             |
| <b>Ir2</b> in water  | 56.45                          | 0.0056            |
| <b>Ir2</b> in 98%THF | 198.71                         | 0.153             |

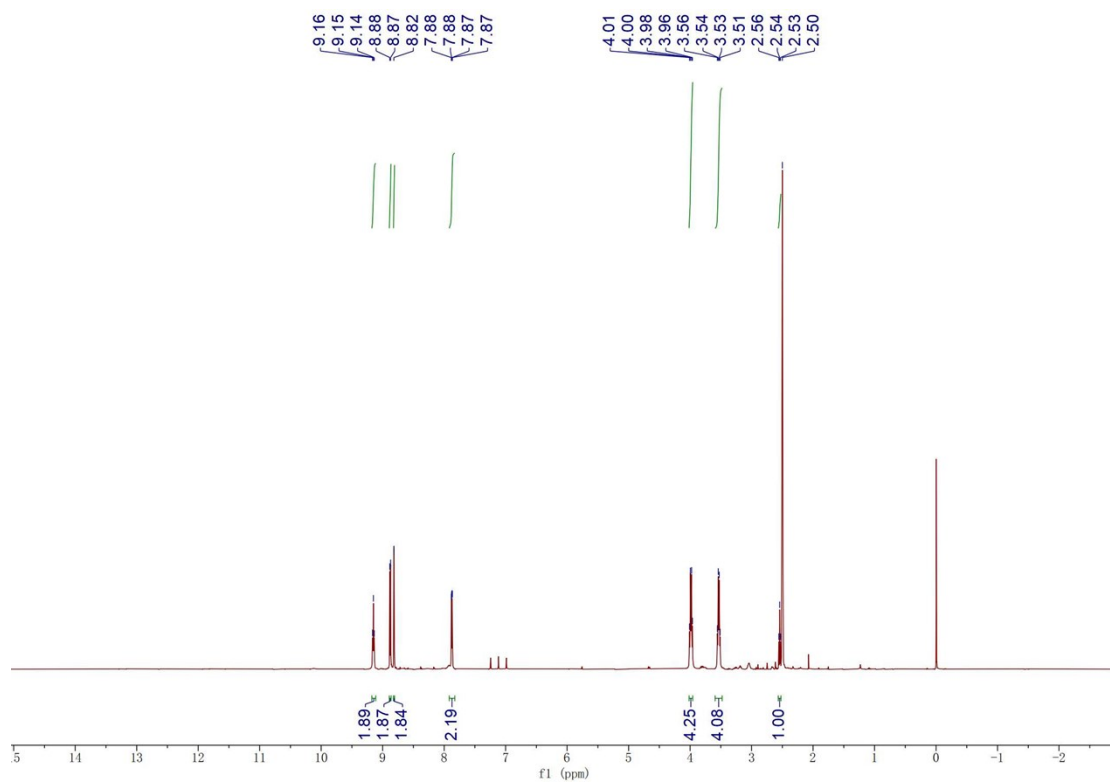

**Figure S1.**  $^1\text{H}$  NMR spectrum of ligand **bpy-OP** in  $\text{D}_2\text{O}/\text{DMSO-d}_6$  (1:30, v/v).

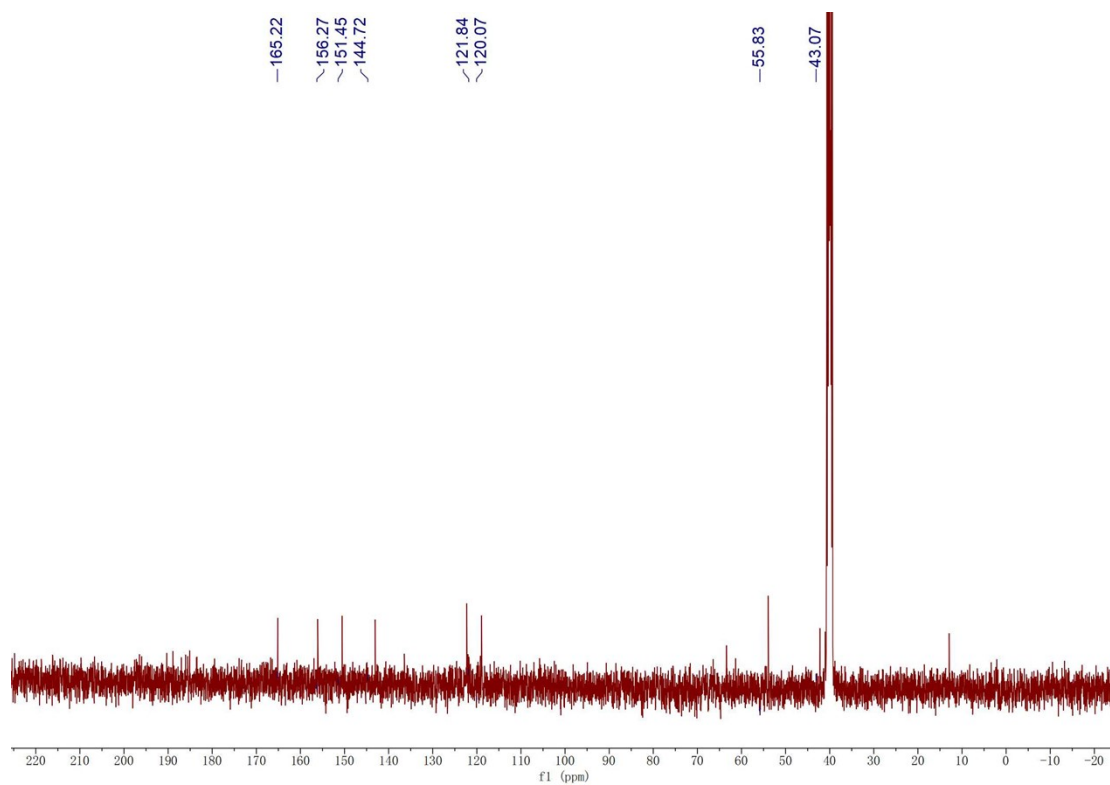

**Figure S2.**  $^{13}\text{C}$  NMR spectrum of ligand **bpy-OP** in  $\text{D}_2\text{O}/\text{DMSO-d}_6$  (1:30, v/v).

-0.47

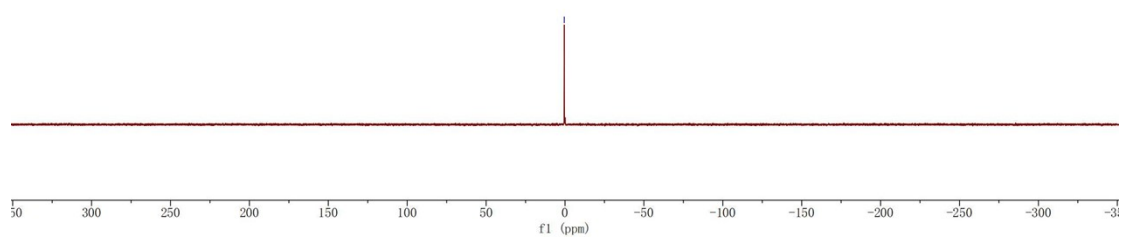

**Figure S3.**  $^{31}\text{P}$  NMR spectrum of ligand **bpy-OP** in  $\text{D}_2\text{O}/\text{DMSO-d}_6$  (1:30, v/v).

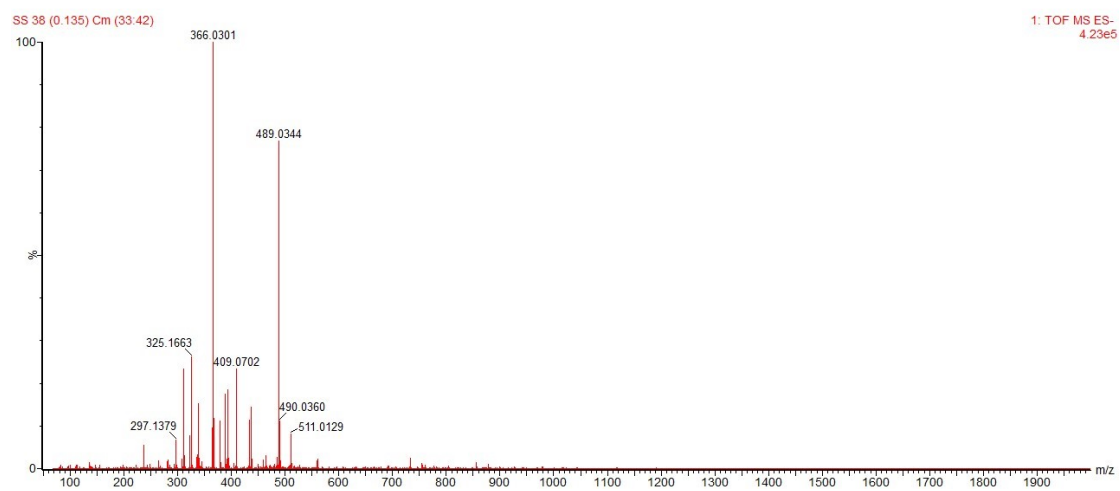

**Figure S4.** High-resolution mass spectrum of **bpy-OP** in MeOH

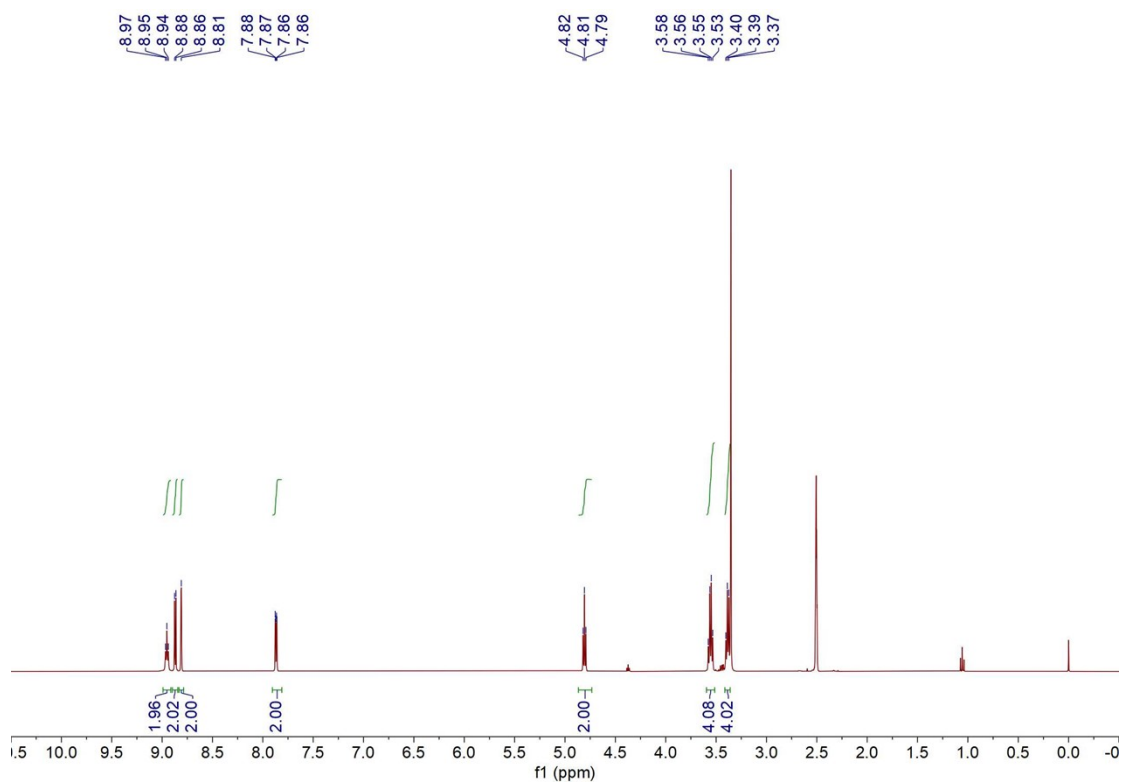

**Figure S5.**  $^1\text{H}$  NMR spectrum of ligand **bpy-OH** in  $\text{D}_2\text{O}/\text{DMSO-d}_6$  (1:30, v/v).

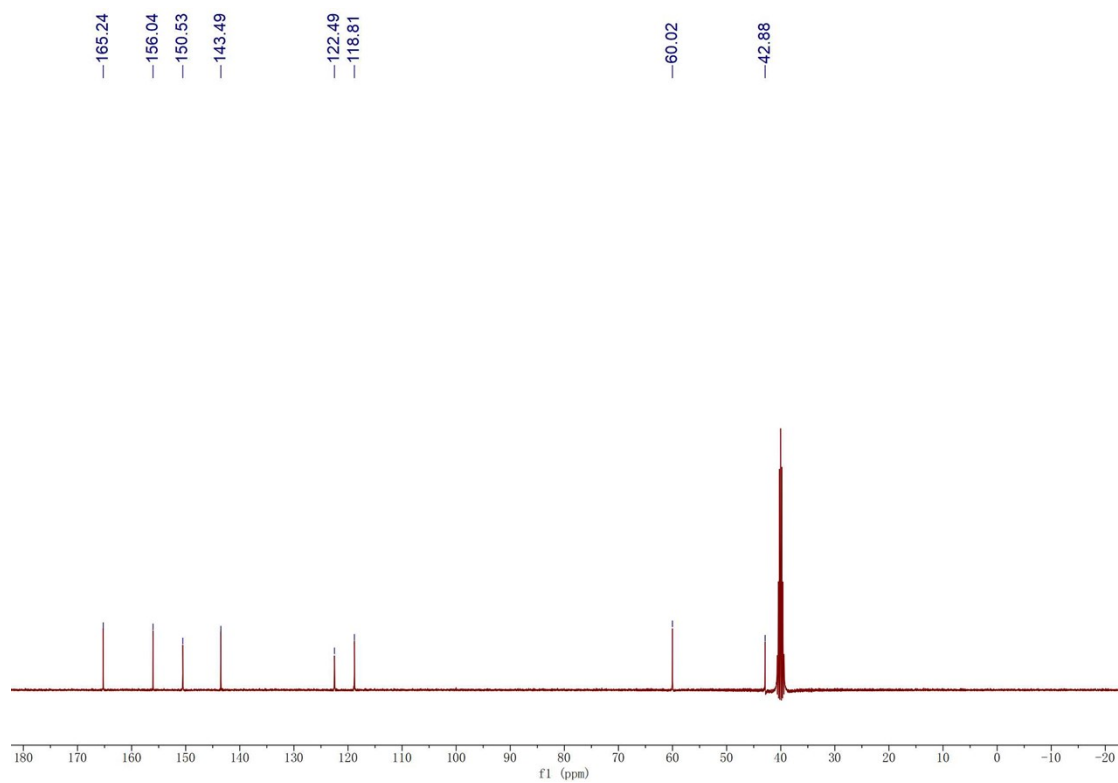

**Figure S6.**  $^{13}\text{C}$  NMR spectrum of ligand **bpy-OH** in  $\text{D}_2\text{O}/\text{DMSO-d}_6$  (1:30, v/v).

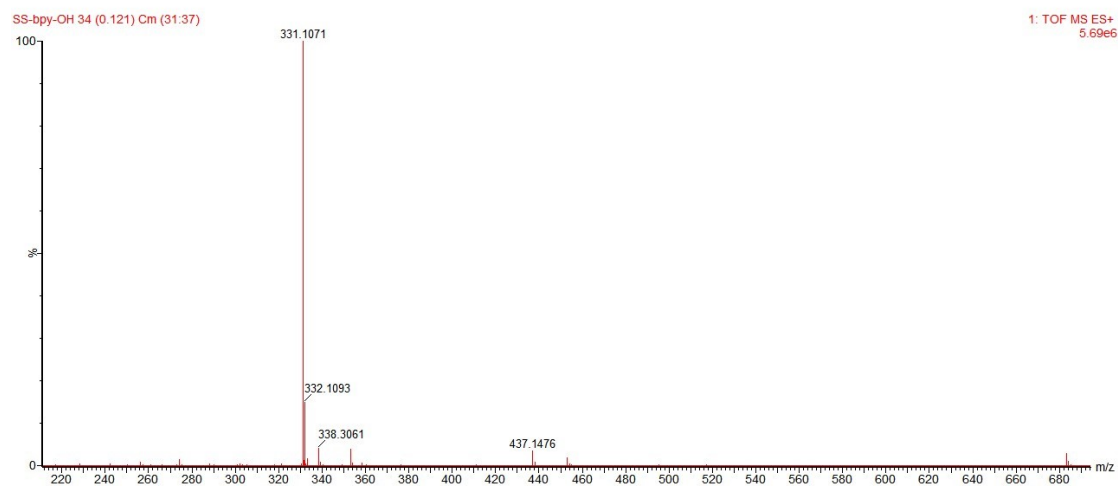

**Figure S7.** High-resolution mass spectrum of **bpy-OH** in MeOH

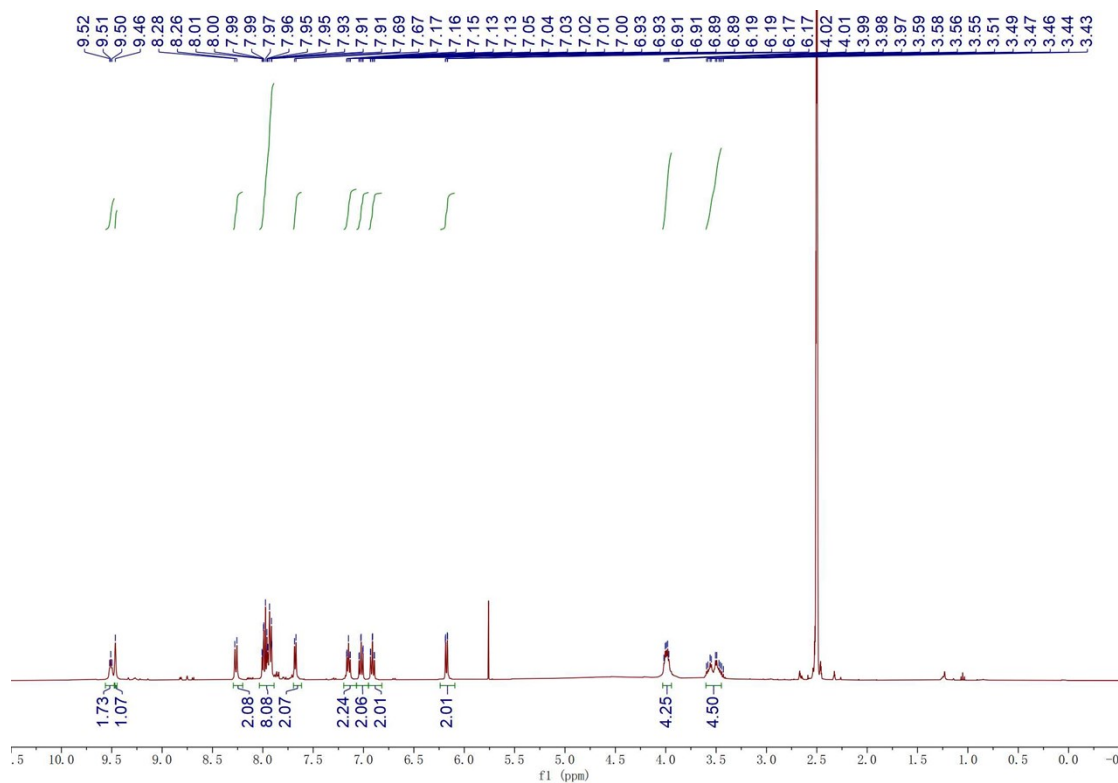

**Figure S8.**  $^1\text{H}$  NMR spectrum of ligand **Ir1** in  $\text{D}_2\text{O}/\text{DMSO-d}_6$  (1:30, v/v).

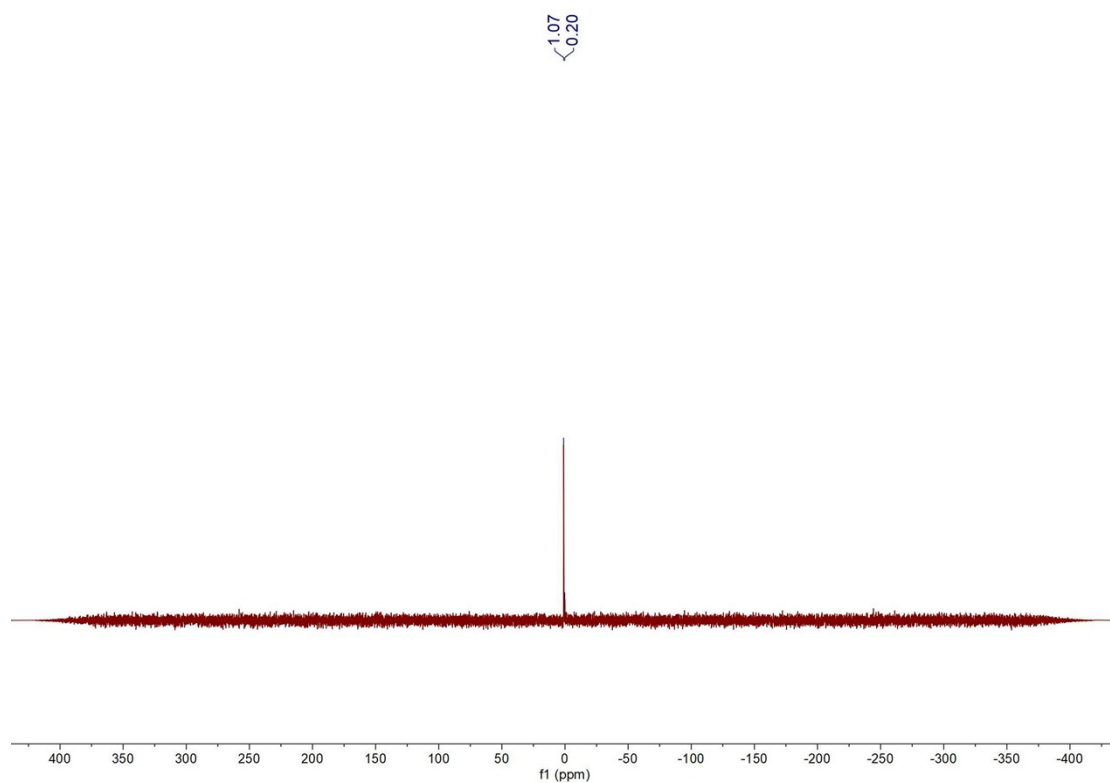

**Figure S9.** <sup>32</sup>P NMR spectrum of ligand Ir1 in D<sub>2</sub>O/DMSO-d<sub>6</sub> (1:30, v/v).

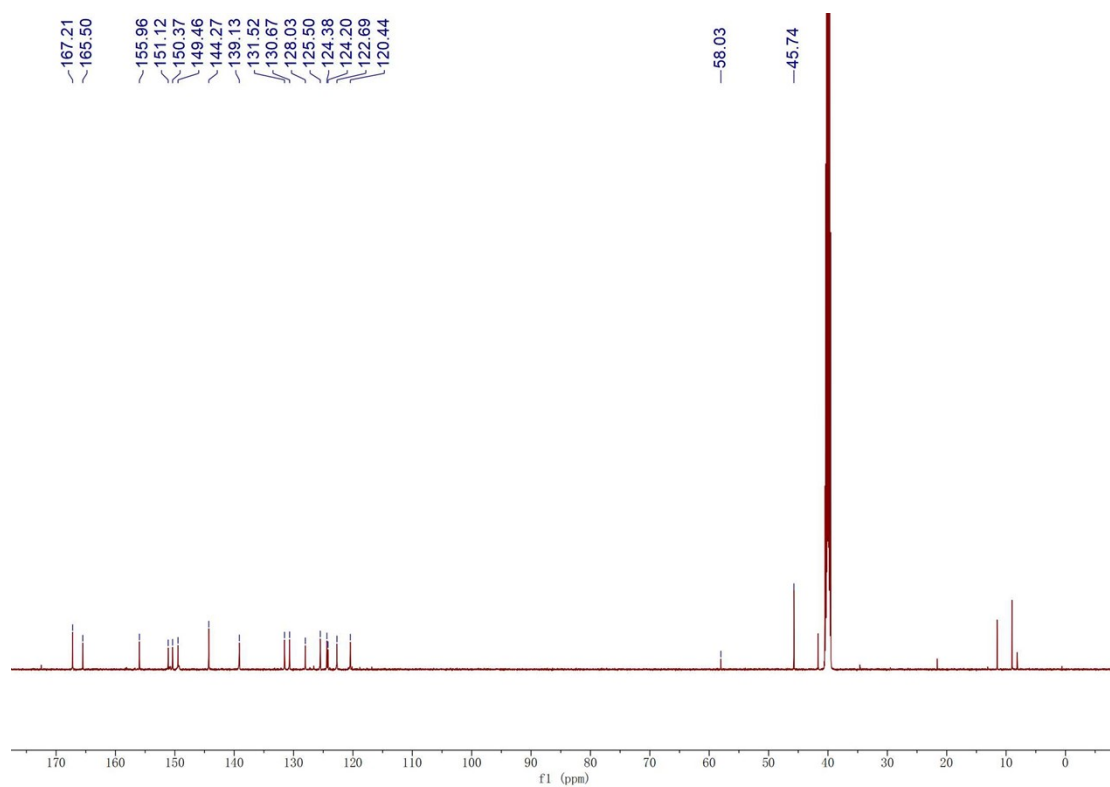

**Figure S10.** <sup>13</sup>C NMR spectrum of ligand Ir1 in D<sub>2</sub>O/DMSO-d<sub>6</sub> (1:30, v/v).

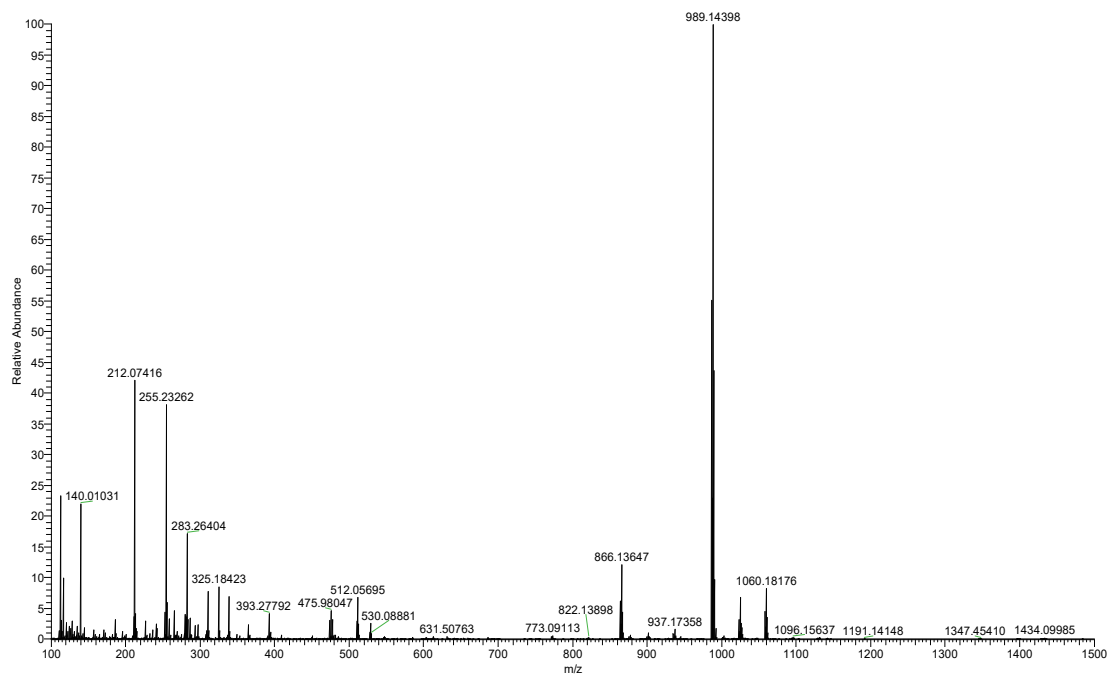

**Figure S11.** High-resolution mass spectrum of Ir1 in MeOH.

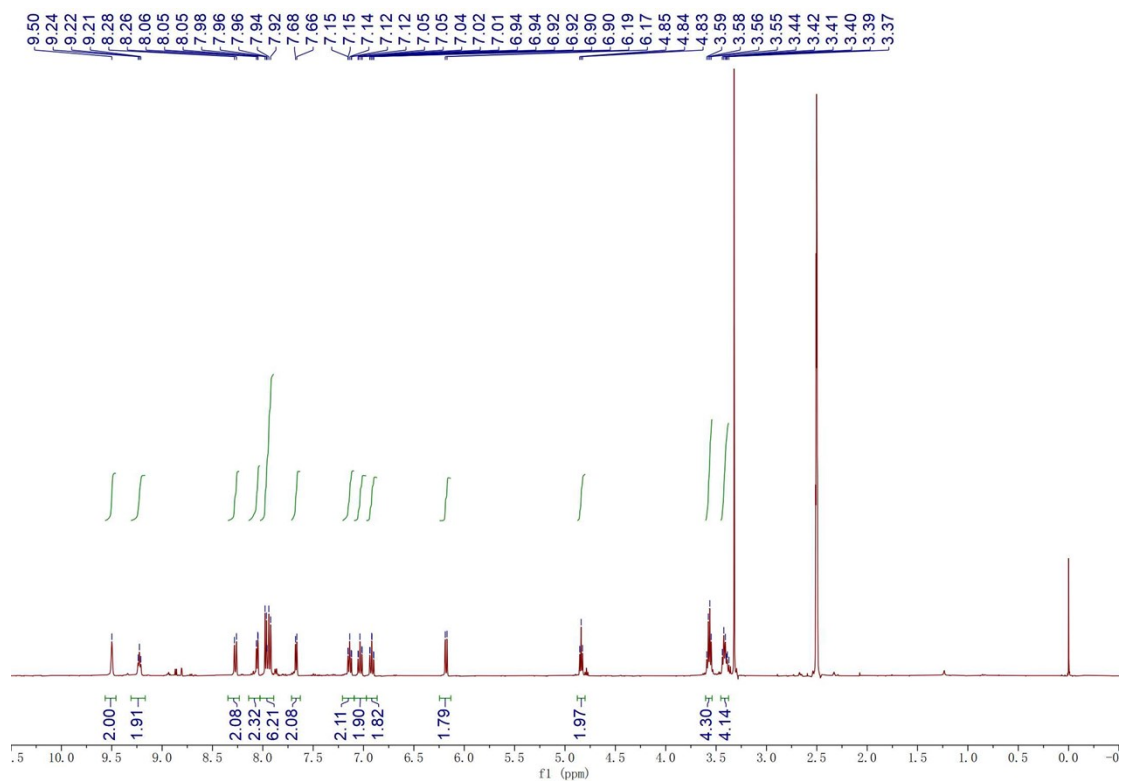

**Figure S12.** <sup>1</sup>H NMR spectrum of ligand Ir2 in D<sub>2</sub>O/DMSO-d<sub>6</sub> (1:30, v/v).



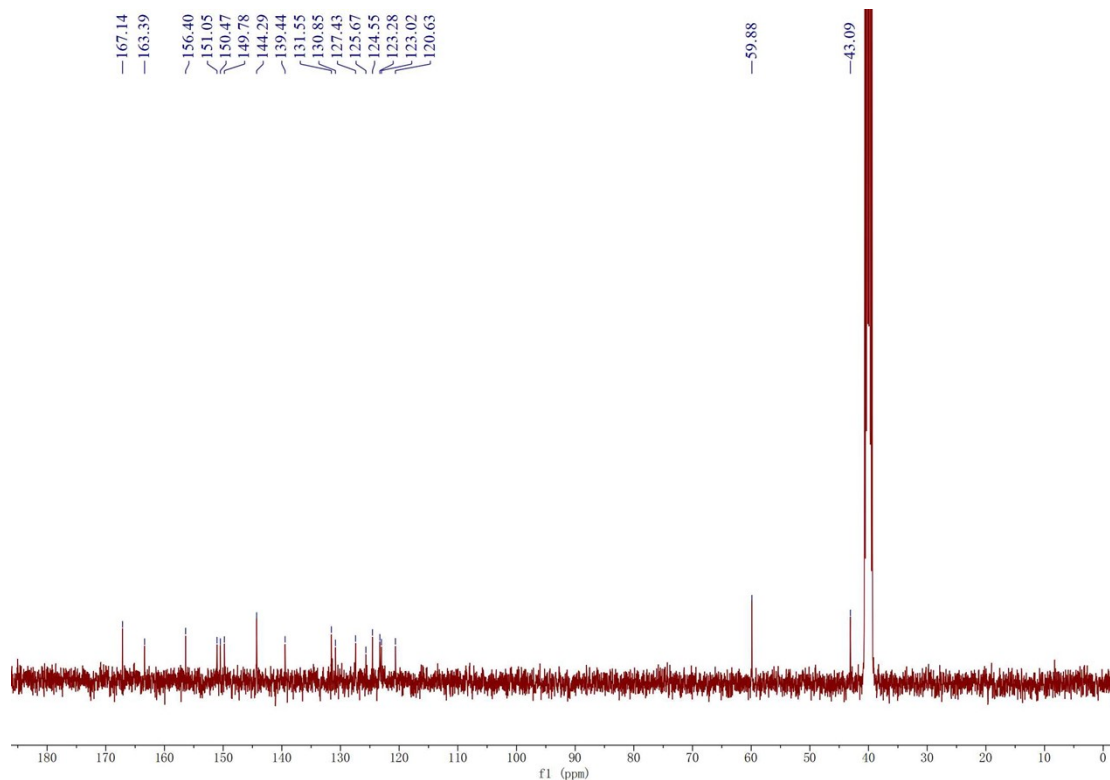

**Figure S13.**  $^{13}\text{C}$  NMR spectrum of ligand **Ir2** in  $\text{D}_2\text{O}/\text{DMSO-d}_6$  (1:30, v/v).

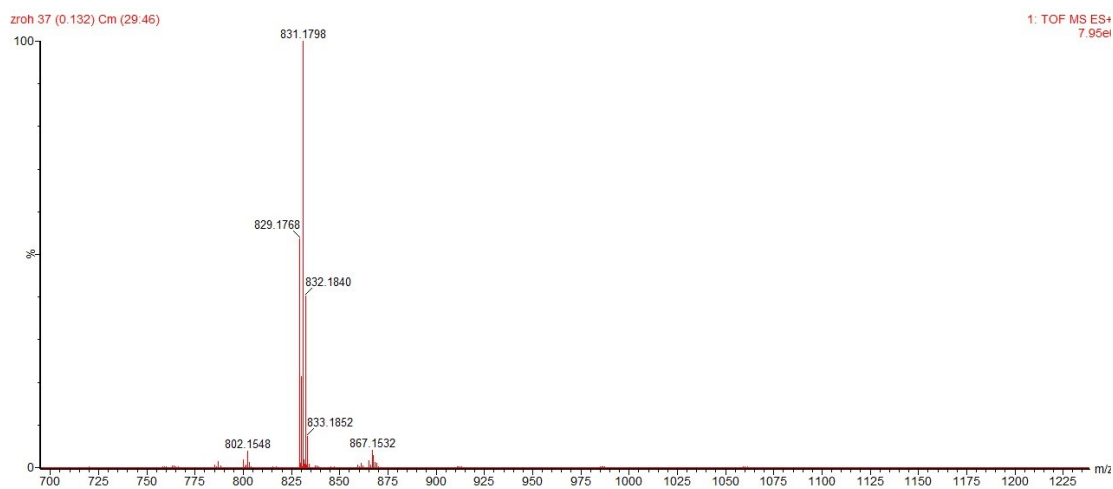

**Figure S14.** High-resolution mass spectrum of **Ir2** in MeOH

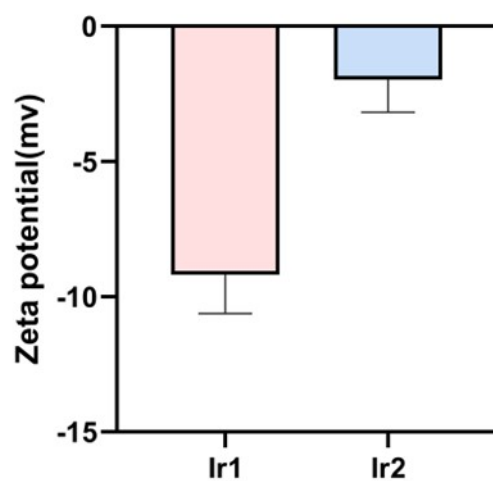

**Figure S15.** Zeta potential of **Ir1** or **Ir2** solution (20 μM).

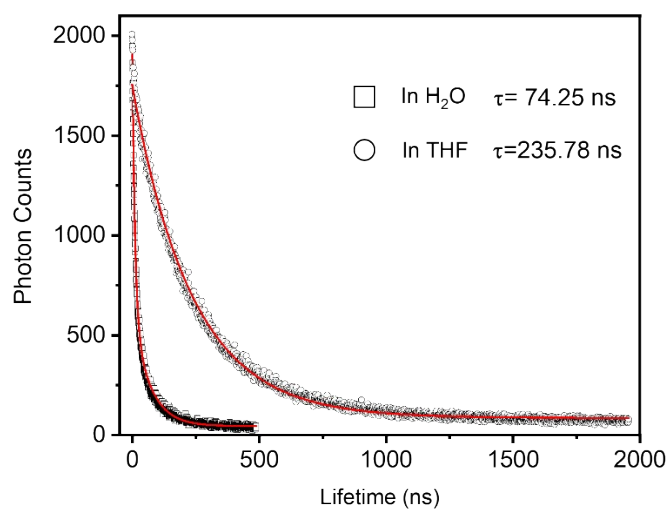

**Fig. S16** Fluorescence decay profiles of **Ir1** in water (squares), or in 98% THF (circles) at room temperature ( $\lambda_{\text{ex}} = 375 \text{ nm}$ ). Fitting equation:  $y = A_1 \times \exp(-x/\tau_1) + A_2 \times \exp(-x/\tau_2)$ .

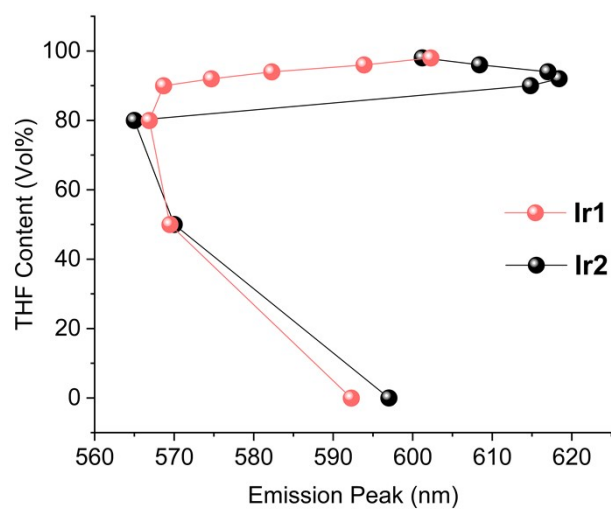

**Figure S17.** Emission peak of **Ir1** or **Ir2** solution (20 $\mu$ M) under different THF contents.  $\lambda_{\text{ex}}$  = 385 nm.

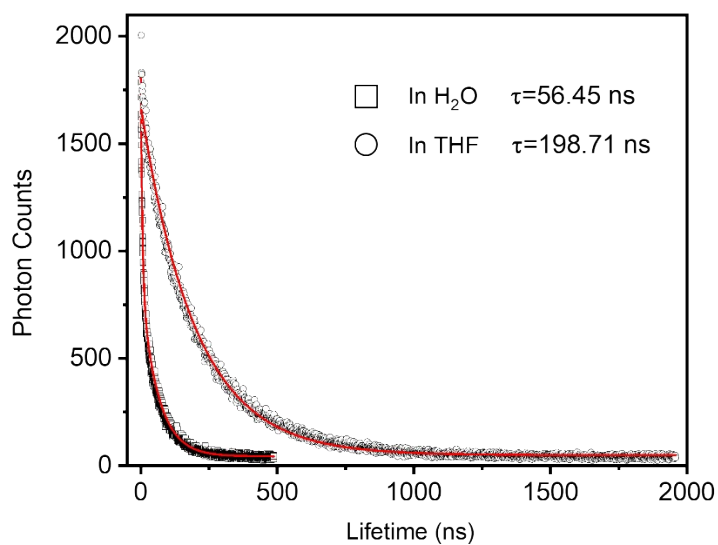

**Fig. S18** Fluorescence decay profiles of **Ir2** in water (squares), or in 98% THF (circles) at room temperature ( $\lambda_{\text{ex}}$  = 375 nm). Fitting equation:  $y = A_1 \times \exp(-x/\tau_1) + A_2 \times \exp(-x/\tau_2)$ .

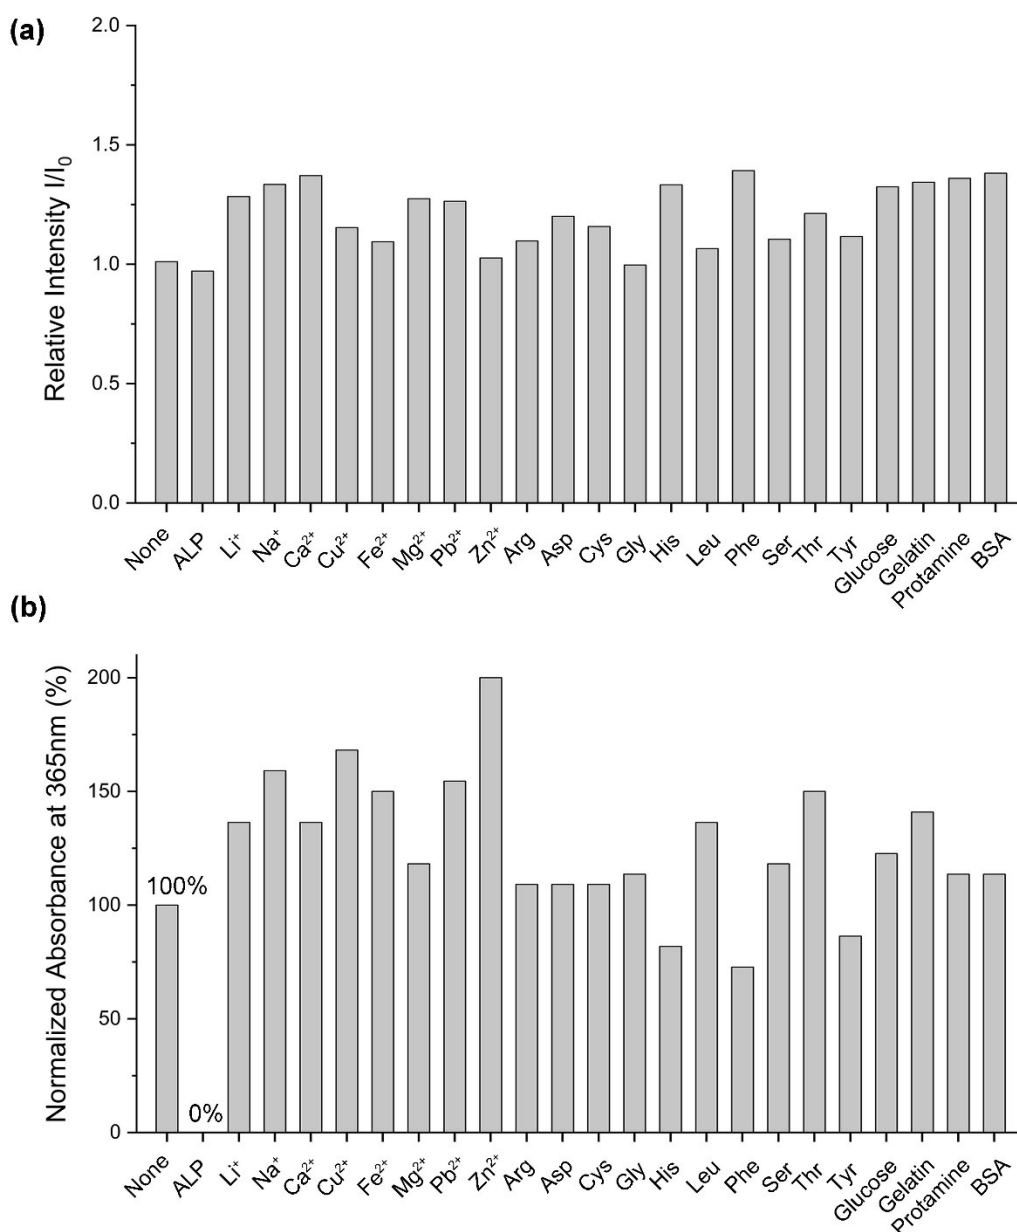

**Fig. S19 (a)** Relative emission intensity of **Ir1** (10  $\mu$ M) in response to selective metal ions and biological species in Tris-HCl buffer (pH = 7.0).  $\lambda_{ex}$  = 385 nm. **(b)** Normalized absorbance of **Ir1** (10  $\mu$ M) at 365nm in response to selective metal ions and biological species in Tris-HCl buffer (pH = 7.0). The absorbance was normalized utilizing the formula:  $A\% = (A - A_1)/(A_0 - A_1)$ , where  $A$  represents the absorbance of (**Ir1** + analyte),  $A_1$  represents the absorbance of **Ir1** upon ALP cleavage; and  $A_0$  represents the absorbance of **Ir1** without any treatments. Tested analytes and concentrations were: 20  $\mu$ M selective metal ions (Ca<sup>2+</sup>, Cu<sup>2+</sup>, Fe<sup>2+</sup>, Li<sup>+</sup>, Mg<sup>2+</sup>, Na<sup>+</sup>, Pb<sup>2+</sup>, and Zn<sup>2+</sup>), 20  $\mu$ M amino acids (Arg, Asp, Cys, Gly, His, Leu, Phe, Ser, Thr, and Tyr), glucose (20  $\mu$ M), gelatin (1 mg/ml), protamine (10  $\mu$ g/ml), BSA (10  $\mu$ g/ml), and ALP (1U/mL), respectively.

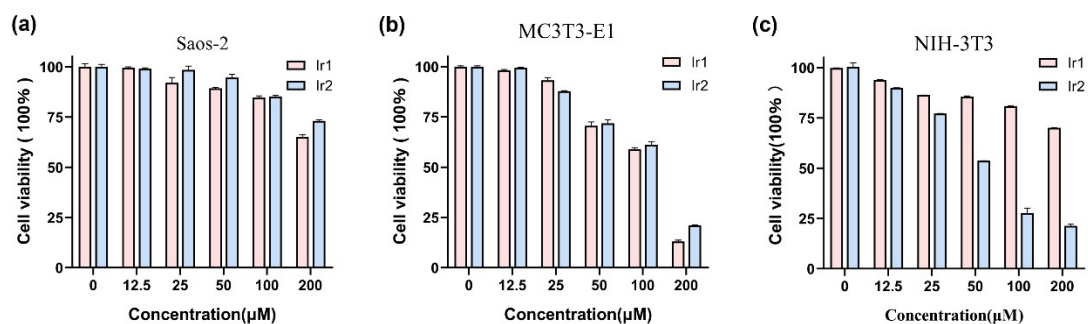

**Figure S20.** In vitro cell viability of (a) Saos-2 cells, (b) MC3T3-E1 cells and (c) NIH-3T3 cells incubated with 20 μM of Ir1 or Ir2 at 37 °C for 48hrs, respectively. Data were reported as mean standard deviation (n = 3).

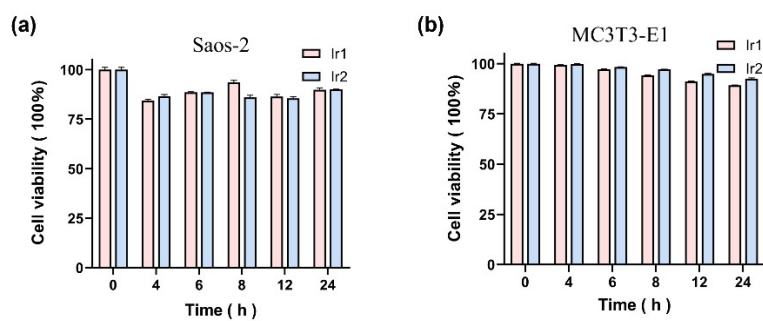

**Figure S21.** In vitro cell viability of (a) Saos-2 cells and (b) MC3T3-E1 cells incubated with 20 μM of Ir1 or Ir2 at 37 °C for different durations of time, respectively. Data were reported as mean standard deviation (n = 3)

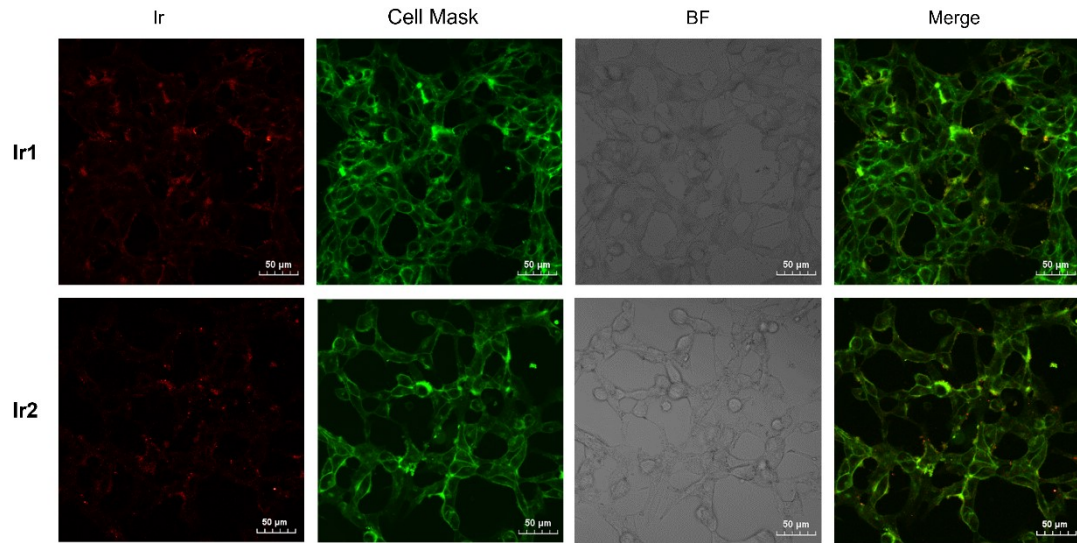

**Figure S22.** Confocal images of Saos-2 cells after treatment with 20 μM **Ir1** or **Ir2** for 1h. Cell membrane was stained with Cell Mask (green). Scale bars represent 50 μm.
